# Supplementary material for: Cancer-Related Neuropathic Pain, Chemotherapy-Induced Peripheral Neuropathy and Cognitive Decline in a 5-Year Prospective Study of Patients with Breast Cancer—NEON-BC
Source: MDPI journal article supplement (doi:10.3390/healthcare11243132), 2023-12-09
Supplement: s1 [file s1]

# Neuropathic pain, chemotherapy-induced peripheral neuropathy and cognitive decline in a 5-year prospective study of patients with breast cancer – NEON-BC.

Susana Pereira, Natália Araújo, Filipa Fontes, Luisa Lopes-Conceição, Teresa Dias, Augusto Ferreira, Samantha Morais, Vítor Tedim Cruz, and Nuno Lunet

## Supplementary material

Table S1. Cancer treatments received during the five years after diagnosis of breast cancer.

|                                                              | Cancer treatments received                               |                                                                                   |                                                                                   |
|--------------------------------------------------------------|----------------------------------------------------------|-----------------------------------------------------------------------------------|-----------------------------------------------------------------------------------|
|                                                              | During the 1 <sup>st</sup> year after diagnosis<br>n (%) | Between the 1 <sup>st</sup> and the 3 <sup>rd</sup> year after diagnosis<br>n (%) | Between the 3 <sup>rd</sup> and the 5 <sup>th</sup> year after diagnosis<br>n (%) |
| <i>Breast surgery</i>                                        |                                                          |                                                                                   |                                                                                   |
| Mastectomy                                                   | 212 (45.9)                                               | -                                                                                 | -                                                                                 |
| Mastectomy + breast-reconstruction                           | 15 (3.2)                                                 | -                                                                                 | -                                                                                 |
| Breast-conserving                                            | 235 (50.9)                                               | -                                                                                 | -                                                                                 |
| Breast reconstruction                                        | -                                                        | 26 (5.6)                                                                          | 33 (7.1)                                                                          |
| Breast-conserving surgery for a contra-lateral breast cancer | -                                                        | 1 (0.2)                                                                           | 3 (0.6)                                                                           |
| Total mastectomy for a contra-lateral breast cancer          | -                                                        | -                                                                                 | 1 (0.2)                                                                           |
| <i>Axillary surgery<sup>a</sup></i>                          |                                                          |                                                                                   |                                                                                   |
| Sentinel lymph node biopsy                                   | 295 (65.9)                                               | -                                                                                 | -                                                                                 |
| Axillary lymph node dissection                               | 153 (34.1)                                               | 1 (0.2)                                                                           | 1 (0.2)                                                                           |
| <i>Metasectomy</i>                                           |                                                          |                                                                                   |                                                                                   |
| Hepatic metastasectomy                                       | -                                                        | 1 (0.2)                                                                           | 1 (0.2)                                                                           |
| Cerebral metastasectomy                                      | -                                                        | 1 (0.2)                                                                           | -                                                                                 |
| <i>Chemotherapy</i>                                          |                                                          |                                                                                   |                                                                                   |
| Timing                                                       |                                                          |                                                                                   |                                                                                   |
| Neo-adjuvant                                                 | 30 (10.8)                                                | -                                                                                 | -                                                                                 |
| Adjuvant                                                     | 249 (89.2)                                               | -                                                                                 | -                                                                                 |
| For a recurrence or another primary cancer                   | -                                                        | 5 (1.1)                                                                           | 10 (2.2)                                                                          |
| <i>Drugs</i>                                                 |                                                          |                                                                                   |                                                                                   |
| Doxorubicin + cyclophosphamide                               | 56 (20.1)                                                | -                                                                                 | -                                                                                 |
| Doxorubicin + cyclophosphamide + docetaxel                   | 29 (10.4)                                                | -                                                                                 | -                                                                                 |
| Doxorubicin + cyclophosphamide + paclitaxel                  | 1 (0.4)                                                  | -                                                                                 | -                                                                                 |
| Cyclophosphamide + docetaxel                                 | 2 (0.7)                                                  | -                                                                                 | -                                                                                 |
| Carboplatin + docetaxel                                      | 1 (0.4)                                                  | -                                                                                 | -                                                                                 |
| 5-FU + epirubicin + cyclophosphamide                         | 23 (8.3)                                                 | -                                                                                 | -                                                                                 |
| 5-FU + epirubicin + cyclophosphamide + docetaxel             | 165 (59.4)                                               | -                                                                                 | 1 (0.1)                                                                           |
| 5-FU + cyclophosphamide + methotrexate                       | 1 (0.4)                                                  | -                                                                                 | -                                                                                 |
| Capecitabine                                                 | -                                                        | 2 (0.9)                                                                           | 3 (0.3)                                                                           |
| Docetaxel                                                    | -                                                        | -                                                                                 | 1 (0.1)                                                                           |
| Paclitaxel                                                   | -                                                        | 3 (0.8)                                                                           | 5 (0.5)                                                                           |
| Vinorelbine                                                  | -                                                        | -                                                                                 | 2 (0.2)                                                                           |
| Carboplatin                                                  | -                                                        | -                                                                                 | 1 (0.1)                                                                           |
| Gemcitabine                                                  | -                                                        | -                                                                                 | 2 (0.2)                                                                           |
| Epirubicin                                                   | -                                                        | -                                                                                 | 1 (0.1)                                                                           |

|                                                          |            |            |            |
|----------------------------------------------------------|------------|------------|------------|
| Rituximab + cyclophosphamide + doxorubicin + vincristine | -          | 1 (0.5)    | -          |
| Radiotherapy (chest, axillary and/or supraclavicular)    | 341 (73.8) | 3 (0.7)    | 4 (0.9)    |
| Endocrine therapy                                        | 388 (84.0) | 385 (83.3) | 379 (82.0) |
| Other systemic treatments                                |            |            |            |
| Trastuzumab                                              | 61 (13.2)  | -          | 2 (0.4)    |
| Pertuzumab                                               | -          | -          | 1 (0.2)    |
| Lapatinib                                                | -          | 1 (0.2)    | -          |

<sup>a</sup> Patients who had both axillary lymph node dissection and sentinel lymph node biopsy are reported as axillary lymph node dissection; N<462, because 14 patients only performed breast surgery.

Table S2. Neurological conditions identified at the baseline neurological exam.

| Neurological condition                       | n  |
|----------------------------------------------|----|
| Low cognitive performance <sup>a</sup>       | 65 |
| Migraine <sup>b</sup>                        | 41 |
| Tremor                                       | 19 |
| Tension headache <sup>c</sup>                | 8  |
| Diabetic Polyneuropathy                      | 3  |
| Polymyelitis sequelae                        | 3  |
| Carpal tunnel syndrome                       | 3  |
| Amaurosis                                    | 2  |
| Cerebrovascular disease                      | 2  |
| Epilepsy                                     | 2  |
| Trigeminal neuralgia                         | 2  |
| Facial paralysis                             | 2  |
| Atrophy and loss of strength in the left arm | 1  |
| Mild left hemiparesis sequelae of meningitis | 1  |
| L5-S1 hernia                                 | 1  |
| Left sciatic nerve injury                    | 1  |
| Tomaculous neuropathy                        | 1  |
| Parkinson' disease                           | 1  |
| Transient ischemic attack                    | 1  |

<sup>a</sup> All cases were considered as probably related with cancer. Cognitive performance was assessed with the Montreal Cognitive Assessment, using age- and education-specific norms.<sup>1</sup>

<sup>b</sup> One case of migraine with aura was considered as related with cancer.

<sup>c</sup> One case of tension headache was considered as related with cancer.

Table S3. Socio-demographics characteristics of the participants, lifestyles, and co-morbidities, at the baseline evaluation, before any treatment, according to the presence of neuropathic pain (NP) over the five years of follow-up – participants who presented NP in at least one evaluation *vs.* participants who never had NP.

|                                                                          | Patients who never<br>had NP<br>n (%) | Patients with NP at<br>least once<br>n (%) | P value      |
|--------------------------------------------------------------------------|---------------------------------------|--------------------------------------------|--------------|
| <i>Living in Greater Porto Area</i>                                      |                                       |                                            | 0.636        |
| No                                                                       | 168 (56.0)                            | 87 (53.7)                                  |              |
| Yes                                                                      | 132 (44.0)                            | 75 (46.3)                                  |              |
| <i>Marital status</i>                                                    |                                       |                                            | <b>0.044</b> |
| Married/living together                                                  | 200 (66.7)                            | 123 (75.9)                                 |              |
| Single                                                                   | 39 (13.0)                             | 10 (6.2)                                   |              |
| Widower/divorced                                                         | 61 (20.3)                             | 29 (17.9)                                  |              |
| <i>Professionally active</i>                                             |                                       |                                            | 0.086        |
| No                                                                       | 150 (50.3)                            | 68 (42.0)                                  |              |
| Yes                                                                      | 148 (49.7)                            | 94 (58.0)                                  |              |
| <i>Monthly income above EUR 500 <sup>a</sup></i>                         |                                       |                                            | 0.075        |
| No                                                                       | 154 (52.0)                            | 96 (60.8)                                  |              |
| Yes                                                                      | 142 (48.0)                            | 62 (39.2)                                  |              |
| <i>Alcohol consumption, more than 10g/day</i>                            |                                       |                                            | 0.782        |
| No                                                                       | 239 (79.7)                            | 130 (80.7)                                 |              |
| Yes                                                                      | 61 (20.3)                             | 31 (19.3)                                  |              |
| <i>Past or current smoker</i>                                            |                                       |                                            | 0.078        |
| No                                                                       | 245 (81.7)                            | 121 (74.7)                                 |              |
| Yes                                                                      | 55 (18.3)                             | 41 (25.3)                                  |              |
| <i>Daily consumption of fruits and vegetables of at least 5 portions</i> |                                       |                                            | 0.890        |
| No                                                                       | 235 (78.3)                            | 126 (77.8)                                 |              |
| Yes                                                                      | 65 (21.7)                             | 36 (22.2)                                  |              |
| <i>Playing a sport</i>                                                   |                                       |                                            | 0.119        |
| No                                                                       | 242 (80.7)                            | 140 (86.4)                                 |              |
| Yes                                                                      | 58 (19.3)                             | 22 (13.6)                                  |              |
| <i>Body Index (kg/m2)</i>                                                |                                       |                                            | 0.925        |
| <18.5                                                                    | 3 (1.0)                               | 2 (1.2)                                    |              |
| 18.5-24.9                                                                | 132 (44.0)                            | 66 (41.0)                                  |              |
| 25.0-29.9                                                                | 100 (33.3)                            | 55 (34.2)                                  |              |
| ≥ 30.0                                                                   | 65 (21.7)                             | 38 (23.6)                                  |              |
| <i>Comorbidities</i>                                                     |                                       |                                            |              |
| <i>Hypertension</i>                                                      |                                       |                                            | 0.276        |
| No                                                                       | 200 (66.7)                            | 116 (71.6)                                 |              |
| Yes                                                                      | 100 (33.3)                            | 46 (28.4)                                  |              |
| <i>Diabetes</i>                                                          |                                       |                                            | 0.713        |
| No                                                                       | 269 (89.7)                            | 147 (90.7)                                 |              |
| Yes                                                                      | 31 (10.3)                             | 15 (9.3)                                   |              |
| <i>Chronic medicines consumption</i>                                     |                                       |                                            | 0.609        |
| None                                                                     | 106 (35.3)                            | 59 (36.4)                                  |              |
| One                                                                      | 55 (18.3)                             | 22 (13.6)                                  |              |
| Two to four                                                              | 95 (31.7)                             | 54 (33.3)                                  |              |
| More than four                                                           | 44 (14.7)                             | 27 (16.7)                                  |              |

<sup>a</sup> EUR500 is the median value of monthly income in the sample

Table S4. Socio-demographics characteristics of the participants, lifestyles, and co-morbidities, at the baseline evaluation, before any treatment, according to the presence of neuropathic pain (NP) over the five years of follow-up – participants who presented NP at the five-year evaluation *vs.* participants who never had NP.

|                                                                          | Patients who<br>never had NP<br>n (%) | Patients with<br>NP at five years<br>n (%) | P value |
|--------------------------------------------------------------------------|---------------------------------------|--------------------------------------------|---------|
| <i>Living in Greater Porto Area</i>                                      |                                       |                                            | 0.300   |
| No                                                                       | 168 (56.0)                            | 37 (49.3)                                  |         |
| Yes                                                                      | 132 (44.0)                            | 38 (50.7)                                  |         |
| <i>Marital status</i>                                                    |                                       |                                            | 0.849   |
| Married/living together                                                  | 200 (66.7)                            | 52 (69.3)                                  |         |
| Single                                                                   | 39 (13.0)                             | 8 (10.7)                                   |         |
| Widower/divorced                                                         | 61 (20.3)                             | 15 (20.0)                                  |         |
| <i>Professionally active</i>                                             |                                       |                                            | 0.439   |
| No                                                                       | 150 (50.3)                            | 34 (45.3)                                  |         |
| Yes                                                                      | 148 (49.7)                            | 41 (54.7)                                  |         |
| <i>Monthly income above EUR 500 <sup>a</sup></i>                         |                                       |                                            | 0.206   |
| No                                                                       | 154 (52.0)                            | 44 (60.3)                                  |         |
| Yes                                                                      | 142 (48.0)                            | 29 (39.7)                                  |         |
| <i>Alcohol consumption, more than 10g/day</i>                            |                                       |                                            | 0.747   |
| No                                                                       | 239 (79.7)                            | 61 (81.3)                                  |         |
| Yes                                                                      | 61 (20.3)                             | 14 (18.7)                                  |         |
| <i>Past or current smoker</i>                                            |                                       |                                            | 0.268   |
| No                                                                       | 245 (81.7)                            | 57 (76.0)                                  |         |
| Yes                                                                      | 55 (18.3)                             | 18 (24.0)                                  |         |
| <i>Daily consumption of fruits and vegetables of at least 5 portions</i> |                                       |                                            | 0.753   |
| No                                                                       | 235 (78.3)                            | 60 (80.0)                                  |         |
| Yes                                                                      | 65 (21.7)                             | 15 (20.0)                                  |         |
| <i>Playing a sport</i>                                                   |                                       |                                            | 0.228   |
| No                                                                       | 242 (80.7)                            | 65 (86.7)                                  |         |
| Yes                                                                      | 58 (19.3)                             | 10 (13.3)                                  |         |
| <i>Body Index (kg/m2)</i>                                                |                                       |                                            | 0.811   |
| <18.5                                                                    | 3 (1.0)                               | 1 (1.4)                                    |         |
| 18.5-24.9                                                                | 132 (44.0)                            | 28 (37.8)                                  |         |
| 25.0-29.9                                                                | 100 (33.3)                            | 27 (36.5)                                  |         |
| ≥ 30.0                                                                   | 65 (21.7)                             | 18 (24.3)                                  |         |
| <i>Comorbidities</i>                                                     |                                       |                                            |         |
| <i>Hypertension</i>                                                      |                                       |                                            | 0.183   |
| No                                                                       | 200 (66.7)                            | 56 (74.7)                                  |         |
| Yes                                                                      | 100 (33.3)                            | 19 (25.3)                                  |         |
| <i>Diabetes</i>                                                          |                                       |                                            | 0.797   |
| No                                                                       | 269 (89.7)                            | 68 (90.7)                                  |         |
| Yes                                                                      | 31 (10.3)                             | 7 (9.3)                                    |         |
| <i>Chronic medicines consumption</i>                                     |                                       |                                            | 0.282   |
| None                                                                     | 106 (35.3)                            | 27 (36.0)                                  |         |
| One                                                                      | 55 (18.3)                             | 7 (9.3)                                    |         |
| Two to four                                                              | 95 (31.7)                             | 28 (37.3)                                  |         |
| More than four                                                           | 44 (14.7)                             | 13 (17.3)                                  |         |

<sup>a</sup> EUR500 is the median value of monthly income in the sample

Table S5. Socio-demographics characteristics of the participants, lifestyles, and co-morbidities, at the baseline evaluation, before any treatment, according to the presence of neuropathic pain (NP) over the five years of follow-up – participants who presented persistently NP in all evaluations *vs.* participants who never had NP.

|                                                                          | Patients who<br>never had NP<br>n (%) | Patients with<br>NP in all<br>evaluations<br>n (%) | P value |
|--------------------------------------------------------------------------|---------------------------------------|----------------------------------------------------|---------|
| <i>Living in Greater Porto Area</i>                                      |                                       |                                                    | 0.713   |
| No                                                                       | 168 (56.0)                            | 19 (52.8)                                          |         |
| Yes                                                                      | 132 (44.0)                            | 17 (47.2)                                          |         |
| <i>Marital status</i>                                                    |                                       |                                                    | 0.933   |
| Married/living together                                                  | 200 (66.7)                            | 25 (69.4)                                          |         |
| Single                                                                   | 39 (13.0)                             | 4 (11.1)                                           |         |
| Widower/divorced                                                         | 61 (20.3)                             | 7 (19.4)                                           |         |
| <i>Professionally active</i>                                             |                                       |                                                    | 0.504   |
| No                                                                       | 150 (50.3)                            | 16 (44.4)                                          |         |
| Yes                                                                      | 148 (49.7)                            | 20 (55.6)                                          |         |
| <i>Monthly income above EUR 500 <sup>a</sup></i>                         |                                       |                                                    | 0.567   |
| No                                                                       | 154 (52.0)                            | 20 (57.1)                                          |         |
| Yes                                                                      | 142 (48.0)                            | 15 (42.9)                                          |         |
| <i>Alcohol consumption, more than 10g/day</i>                            |                                       |                                                    | 0.603   |
| No                                                                       | 239 (79.7)                            | 30 (83.3)                                          |         |
| Yes                                                                      | 61 (20.3)                             | 6 (16.7)                                           |         |
| <i>Past or current smoker</i>                                            |                                       |                                                    | 0.871   |
| No                                                                       | 245 (81.7)                            | 29 (80.6)                                          |         |
| Yes                                                                      | 55 (18.3)                             | 7 (19.4)                                           |         |
| <i>Daily consumption of fruits and vegetables of at least 5 portions</i> |                                       |                                                    | 0.228   |
| No                                                                       | 235 (78.3)                            | 25 (69.4)                                          |         |
| Yes                                                                      | 65 (21.7)                             | 11 (30.6)                                          |         |
| <i>Playing a sport</i>                                                   |                                       |                                                    | 0.106   |
| No                                                                       | 242 (80.7)                            | 33 (91.7)                                          |         |
| Yes                                                                      | 58 (19.3)                             | 3 (8.3)                                            |         |
| <i>Body Index (kg/m<sup>2</sup>)</i>                                     |                                       |                                                    | 0.460   |
| <18.5                                                                    | 3 (1.0)                               | 0 (0.0)                                            |         |
| 18.5-24.9                                                                | 132 (44.0)                            | 11 (31.4)                                          |         |
| 25.0-29.9                                                                | 100 (33.3)                            | 14 (40.0)                                          |         |
| ≥ 30.0                                                                   | 65 (21.7)                             | 10 (28.6)                                          |         |
| <i>Comorbidities</i>                                                     |                                       |                                                    |         |
| <i>Hypertension</i>                                                      |                                       |                                                    | 0.091   |
| No                                                                       | 200 (66.7)                            | 29 (80.6)                                          |         |
| Yes                                                                      | 100 (33.3)                            | 7 (19.4)                                           |         |
| <i>Diabetes</i>                                                          |                                       |                                                    | 0.885   |
| No                                                                       | 269 (89.7)                            | 32 (88.9)                                          |         |
| Yes                                                                      | 31 (10.3)                             | 4 (11.1)                                           |         |
| <i>Chronic medicines consumption</i>                                     |                                       |                                                    | 0.643   |
| None                                                                     | 106 (35.3)                            | 12 (33.3)                                          |         |
| One                                                                      | 55 (18.3)                             | 4 (11.1)                                           |         |
| Two to four                                                              | 95 (31.7)                             | 13 (36.1)                                          |         |
| More than four                                                           | 44 (14.7)                             | 7 (19.4)                                           |         |

<sup>a</sup> EUR500 is the median value of monthly income in the sample

Table S6. Socio-demographics characteristics of the participants, lifestyles, and co-morbidities, at the baseline evaluation, before any treatment, according to the presence of chemotherapy-induced peripheral neuropathy (CIPN) over the five years of follow-up among those who were treated with chemotherapy– participants who presented CIPN in at least one evaluation *vs.* participants who never had CIPN.

|                                                                          | Patients who never<br>had CIPN<br>n (%) | Patients with CIPN at<br>least once<br>n (%) | P value |
|--------------------------------------------------------------------------|-----------------------------------------|----------------------------------------------|---------|
| <i>Living in Greater Porto Area</i>                                      |                                         |                                              | 0.172   |
| No                                                                       | 117 (56.5)                              | 35 (47.3)                                    |         |
| Yes                                                                      | 90 (43.5)                               | 39 (52.7)                                    |         |
| <i>Marital status</i>                                                    |                                         |                                              | 0.901   |
| Married/living together                                                  | 147 (71.0)                              | 51 (68.9)                                    |         |
| Single                                                                   | 23 (11.1)                               | 8 (10.8)                                     |         |
| Widower/divorced                                                         | 37 (17.9)                               | 15 (20.3)                                    |         |
| <i>Professionally active</i>                                             |                                         |                                              | 0.531   |
| No                                                                       | 86 (41.7)                               | 34 (45.9)                                    |         |
| Yes                                                                      | 120 (58.3)                              | 40 (54.1)                                    |         |
| <i>Monthly income above EUR 500 <sup>a</sup></i>                         |                                         |                                              | 0.914   |
| No                                                                       | 109 (53.4)                              | 39 (54.2)                                    |         |
| Yes                                                                      | 95 (46.6)                               | 33 (45.8)                                    |         |
| <i>Alcohol consumption, more than 10g/day</i>                            |                                         |                                              | 0.869   |
| No                                                                       | 41 (19.8)                               | 14 (18.9)                                    |         |
| Yes                                                                      | 166 (80.2)                              | 60 (81.1)                                    |         |
| <i>Past or current smoker</i>                                            |                                         |                                              | 0.434   |
| No                                                                       | 163 (78.7)                              | 55 (74.3)                                    |         |
| Yes                                                                      | 44 (21.3)                               | 19 (25.7)                                    |         |
| <i>Daily consumption of fruits and vegetables of at least 5 portions</i> |                                         |                                              | 0.186   |
| No                                                                       | 155 (74.9)                              | 61 (82.4)                                    |         |
| Yes                                                                      | 52 (25.1)                               | 13 (17.6)                                    |         |
| <i>Playing a sport</i>                                                   |                                         |                                              | 0.497   |
| No                                                                       | 169 (81.6)                              | 63 (85.1)                                    |         |
| Yes                                                                      | 38 (18.4)                               | 11 (14.9)                                    |         |
| <i>Body Index (kg/m2)</i>                                                |                                         |                                              | 0.396   |
| <18.5                                                                    | 3 (1.4)                                 | 0 (0.0)                                      |         |
| 18.5-24.9                                                                | 83 (40.1)                               | 30 (41.1)                                    |         |
| 25.0-29.9                                                                | 73 (35.3)                               | 31 (42.5)                                    |         |
| ≥ 30.0                                                                   | 48 (23.2)                               | 12 (16.4)                                    |         |
| <i>Comorbidities</i>                                                     |                                         |                                              | 0.957   |
| <i>Hypertension</i>                                                      |                                         |                                              |         |
| No                                                                       | 156 (75.4)                              | 56 (75.7)                                    |         |
| Yes                                                                      | 51 (24.6)                               | 18 (24.3)                                    | 0.232   |
| <i>Diabetes</i>                                                          |                                         |                                              |         |
| No                                                                       | 190 (91.8)                              | 71 (95.9)                                    |         |
| Yes                                                                      | 17 (8.2)                                | 3 (4.1)                                      |         |
| <i>Chronic medicines consumption</i>                                     |                                         |                                              | 0.282   |
| None                                                                     | 83 (40.1)                               | 30 (40.5)                                    |         |
| One                                                                      | 42 (20.3)                               | 8 (10.8)                                     |         |
| Two to four                                                              | 61 (29.5)                               | 27 (36.5)                                    |         |
| More than four                                                           | 21 (10.1)                               | 9 (12.2)                                     |         |

<sup>a</sup> EUR500 is the median value of monthly income in the sample

Table S7. Socio-demographics characteristics of the participants, lifestyles, and co-morbidities, at the baseline evaluation, before any treatment, according to the presence of chemotherapy-induced peripheral neuropathy (CIPN) over the five years of follow-up among those who were treated with chemotherapy– participants who presented CIPN at the five-year evaluation *vs.* participants who never had CIPN.

|                                                                          | Patients who<br>never had<br>CIPN<br>n (%) | Patients with<br>CIPN at all<br>evaluations<br>n (%) | P value |
|--------------------------------------------------------------------------|--------------------------------------------|------------------------------------------------------|---------|
| <i>Living in Greater Porto Area</i>                                      |                                            |                                                      | 0.081   |
| No                                                                       | 117 (56.5)                                 | 19 (42.2)                                            |         |
| Yes                                                                      | 90 (43.5)                                  | 26 (57.8)                                            |         |
| <i>Marital status</i>                                                    |                                            |                                                      | 0.789   |
| Married/living together                                                  | 147 (71.0)                                 | 30 (66.7)                                            |         |
| Single                                                                   | 23 (11.1)                                  | 5 (11.1)                                             |         |
| Widower/divorced                                                         | 37 (17.9)                                  | 10 (22.2)                                            |         |
| <i>Professionally active</i>                                             |                                            |                                                      | 0.740   |
| No                                                                       | 86 (41.7)                                  | 20 (44.4)                                            |         |
| Yes                                                                      | 120 (58.3)                                 | 25 (55.6)                                            |         |
| <i>Monthly income above EUR 500 <sup>a</sup></i>                         |                                            |                                                      | 0.492   |
| No                                                                       | 109 (53.4)                                 | 21 (47.7)                                            |         |
| Yes                                                                      | 95 (46.6)                                  | 23 (52.3)                                            |         |
| <i>Alcohol consumption, more than 10g/day</i>                            |                                            |                                                      | 0.715   |
| No                                                                       | 41 (19.8)                                  | 10 (22.2)                                            |         |
| Yes                                                                      | 166 (80.2)                                 | 35 (77.8)                                            |         |
| <i>Past or current smoker</i>                                            |                                            |                                                      | 0.886   |
| No                                                                       | 163 (78.7)                                 | 35 (77.8)                                            |         |
| Yes                                                                      | 44 (21.3)                                  | 10 (22.2)                                            |         |
| <i>Daily consumption of fruits and vegetables of at least 5 portions</i> |                                            |                                                      | 0.170   |
| No                                                                       | 155 (74.9)                                 | 38 (84.4)                                            |         |
| Yes                                                                      | 52 (25.1)                                  | 7 (15.6)                                             |         |
| <i>Playing a sport</i>                                                   |                                            |                                                      | 0.798   |
| No                                                                       | 169 (81.6)                                 | 36 (80.0)                                            |         |
| Yes                                                                      | 38 (18.4)                                  | 9 (20.0)                                             |         |
| <i>Body Index (kg/m<sup>2</sup>)</i>                                     |                                            |                                                      | 0.726   |
| <18.5                                                                    | 3 (1.4)                                    | 0 (0.0)                                              |         |
| 18.5-24.9                                                                | 83 (40.1)                                  | 20 (45.5)                                            |         |
| 25.0-29.9                                                                | 73 (35.3)                                  | 16 (36.4)                                            |         |
| ≥ 30.0                                                                   | 48 (23.2)                                  | 8 (18.2)                                             |         |
| <i>Comorbidities</i>                                                     |                                            |                                                      |         |
| <i>Hypertension</i>                                                      |                                            |                                                      | 0.508   |
| No                                                                       | 156 (75.4)                                 | 36 (80.0)                                            |         |
| Yes                                                                      | 51 (24.6)                                  | 9 (20.0)                                             |         |
| <i>Diabetes</i>                                                          |                                            |                                                      | 0.386   |
| No                                                                       | 190 (91.8)                                 | 43 (95.6)                                            |         |
| Yes                                                                      | 17 (8.2)                                   | 2 (4.4)                                              |         |
| <i>Chronic medicines consumption</i>                                     |                                            |                                                      | 0.485   |
| None                                                                     | 83 (40.1)                                  | 22 (48.9)                                            |         |
| One                                                                      | 42 (20.3)                                  | 5 (11.1)                                             |         |
| Two to four                                                              | 61 (29.5)                                  | 14 (31.1)                                            |         |
| More than four                                                           | 21 (10.1)                                  | 4 (8.9)                                              |         |

<sup>a</sup> EUR500 is the median value of monthly income in the sample

Table S8. Socio-demographics characteristics of the participants, lifestyles, and co-morbidities, at the baseline evaluation, before any treatment, according to the presence of chemotherapy-induced peripheral neuropathy (CIPN) over the five years of follow-up among those who were treated with chemotherapy– participants who presented CIPN at all evaluations *vs.* participants who never had CIPN.

|                                                                          | Patients who<br>never had NP<br>n (%) | Patients with<br>NP in all<br>evaluations<br>n (%) | P value      |
|--------------------------------------------------------------------------|---------------------------------------|----------------------------------------------------|--------------|
| <i>Living in Greater Porto Area</i>                                      |                                       |                                                    | 0.388        |
| No                                                                       | 168 (56.0)                            | 16 (48.5)                                          |              |
| Yes                                                                      | 132 (44.0)                            | 17 (51.5)                                          |              |
| <i>Marital status</i>                                                    |                                       |                                                    | 0.871        |
| Married/living together                                                  | 200 (66.7)                            | 22 (66.7)                                          |              |
| Single                                                                   | 39 (13.0)                             | 4 (12.1)                                           |              |
| Widower/divorced                                                         | 61 (20.3)                             | 7 (21.2)                                           |              |
| <i>Professionally active</i>                                             |                                       |                                                    | 0.942        |
| No                                                                       | 150 (50.3)                            | 14 (42.4)                                          |              |
| Yes                                                                      | 148 (49.7)                            | 19 (57.6)                                          |              |
| <i>Monthly income above EUR 500 <sup>a</sup></i>                         |                                       |                                                    | 0.718        |
| No                                                                       | 154 (52.0)                            | 16 (50.0)                                          |              |
| Yes                                                                      | 142 (48.0)                            | 16 (50.0)                                          |              |
| <i>Alcohol consumption, more than 10g/day</i>                            |                                       |                                                    | 0.327        |
| No                                                                       | 239 (79.7)                            | 9 (27.3)                                           |              |
| Yes                                                                      | 61 (20.3)                             | 24 (72.7)                                          |              |
| <i>Past or current smoker</i>                                            |                                       |                                                    | 0.439        |
| No                                                                       | 245 (81.7)                            | 24 (72.7)                                          |              |
| Yes                                                                      | 55 (18.3)                             | 9 (27.3)                                           |              |
| <i>Daily consumption of fruits and vegetables of at least 5 portions</i> |                                       |                                                    | <b>0.042</b> |
| No                                                                       | 235 (78.3)                            | 30 (90.9)                                          |              |
| Yes                                                                      | 65 (21.7)                             | 3 (9.1)                                            |              |
| <i>Playing a sport</i>                                                   |                                       |                                                    | 0.656        |
| No                                                                       | 242 (80.7)                            | 28 (84.8)                                          |              |
| Yes                                                                      | 58 (19.3)                             | 5 (15.2)                                           |              |
| <i>Body Index (kg/m2)</i>                                                |                                       |                                                    | 0.753        |
| <18.5                                                                    | 3 (1.0)                               | 0 (0.0)                                            |              |
| 18.5-24.9                                                                | 132 (44.0)                            | 13 (39.4)                                          |              |
| 25.0-29.9                                                                | 100 (33.3)                            | 14 (42.4)                                          |              |
| ≥ 30.0                                                                   | 65 (21.7)                             | 6 (18.2)                                           |              |
| <i>Comorbidities</i>                                                     |                                       |                                                    |              |
| <i>Hypertension</i>                                                      |                                       |                                                    | 0.418        |
| No                                                                       | 200 (66.7)                            | 27 (81.8)                                          |              |
| Yes                                                                      | 100 (33.3)                            | 6 (18.2)                                           |              |
| <i>Diabetes</i>                                                          |                                       |                                                    | 0.671        |
| No                                                                       | 269 (89.7)                            | 31 (93.9)                                          |              |
| Yes                                                                      | 31 (10.3)                             | 2 (6.1)                                            |              |
| <i>Chronic medicines consumption</i>                                     |                                       |                                                    | 0.546        |
| None                                                                     | 106 (35.3)                            | 15 (45.5)                                          |              |
| One                                                                      | 55 (18.3)                             | 4 (12.1)                                           |              |
| Two to four                                                              | 95 (31.7)                             | 12 (36.4)                                          |              |
| More than four                                                           | 44 (14.7)                             | 2 (6.1)                                            |              |

<sup>a</sup> EUR500 is the median value of monthly income in the sample



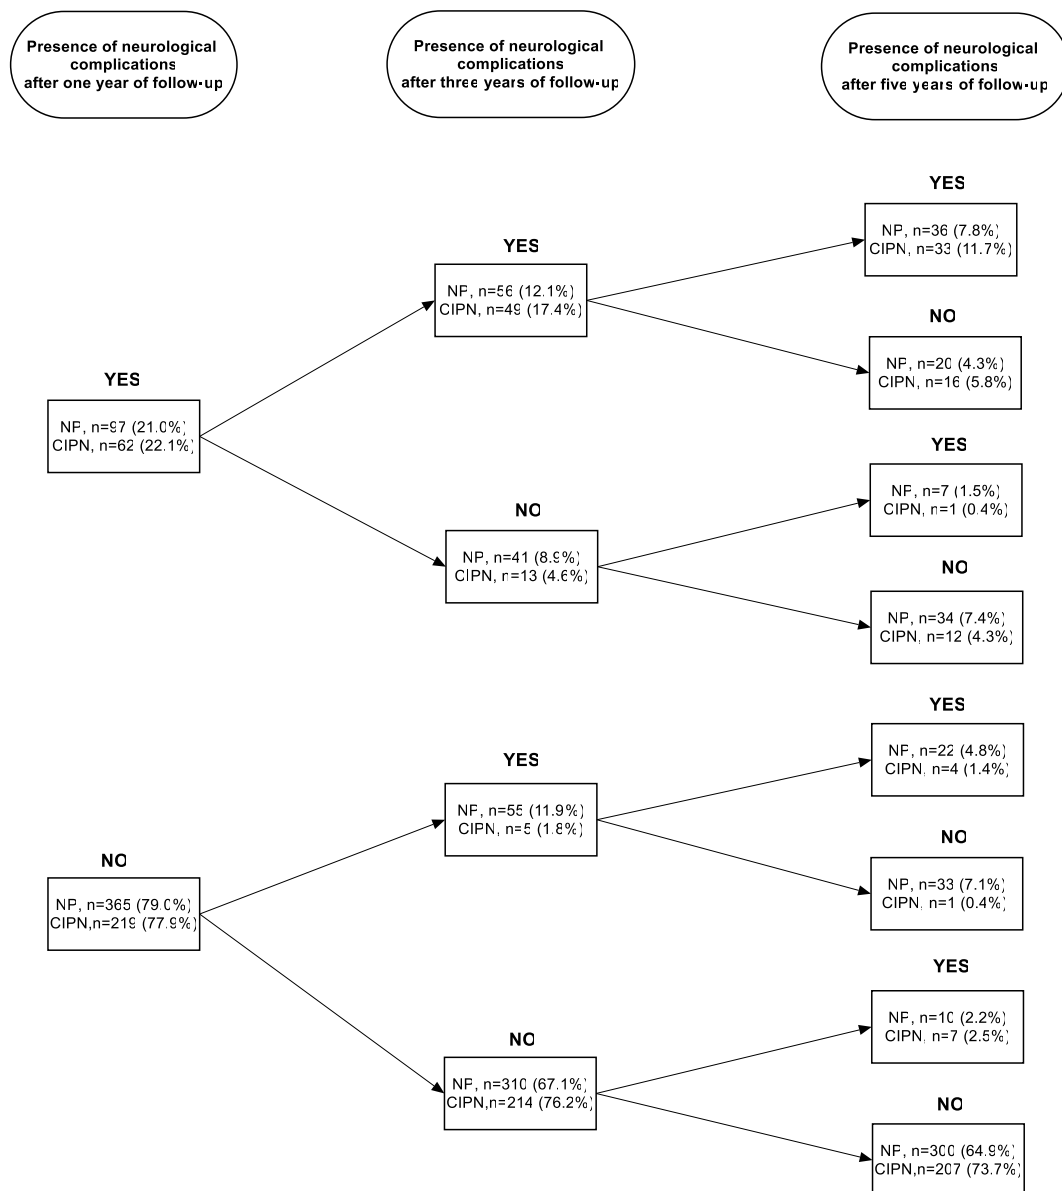

Figure S1. Presence of neurological complications after one, three and five years after diagnosis. NP, Neuropathic pain; CIPN, Chemotherapy-induced peripheral neuropathy. For neuropathic pain, the percentages are relative to the entire sample, N=462; for chemotherapy-induced peripheral neuropathy, the percentages are relative to participants who were treated with chemotherapy over the five years, N=281.

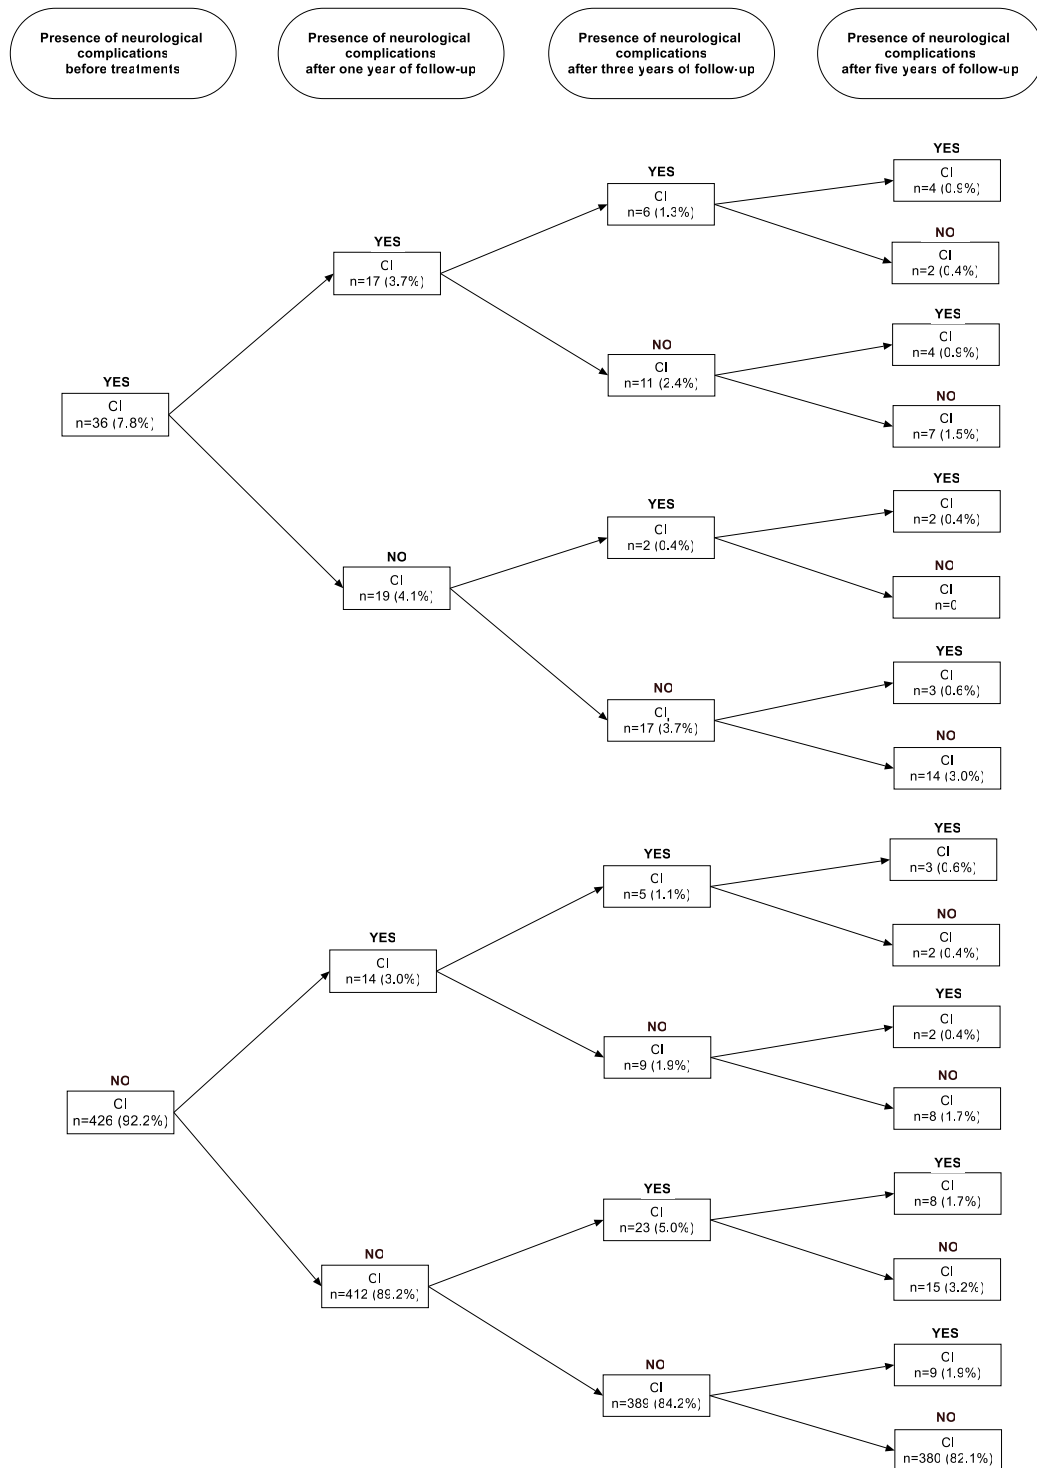

Figure S2. Presence of cognitive impairment before treatments and at one, three and five years since diagnosis. CI, cognitive impairment.

The percentages are relative to the entire sample number, N=462.
